# Supplementary material for: CD274 promotes cell cycle entry of leukemia-initiating cells through JNK/Cyclin D2 signaling
Source: PubMed Central journal article supplement (PMC5114730; doi:10.1186/s13045-016-0350-6), 2016-11-17

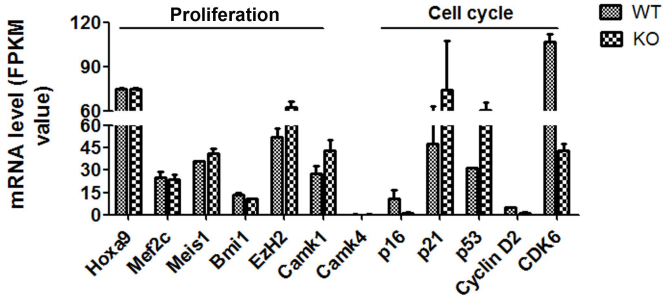

Supplement: 13045_2016_350_MOESM5_ESM.pdf [file 13045_2016_350_MOESM5_ESM.pdf]
