# Supplementary material for: CD274 promotes cell cycle entry of leukemia-initiating cells through JNK/Cyclin D2 signaling
Source: Springer Nature journal article supplement (doi:10.1186/s13045-016-0350-6), 2016-11-17

**A**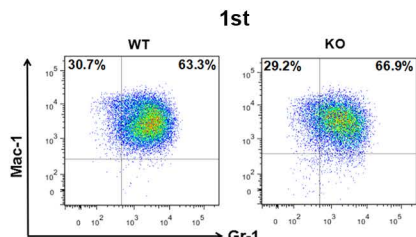**B**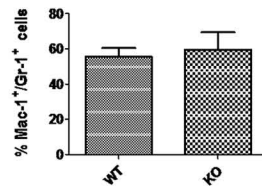**D**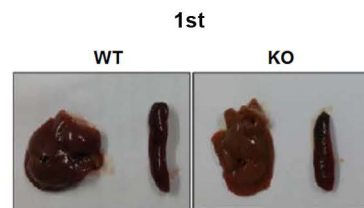**C**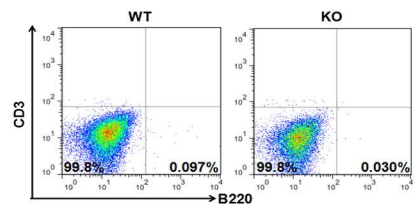**E**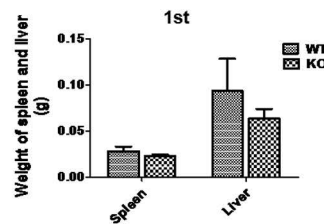**F**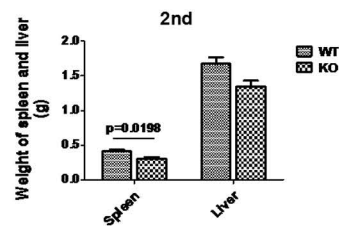**G**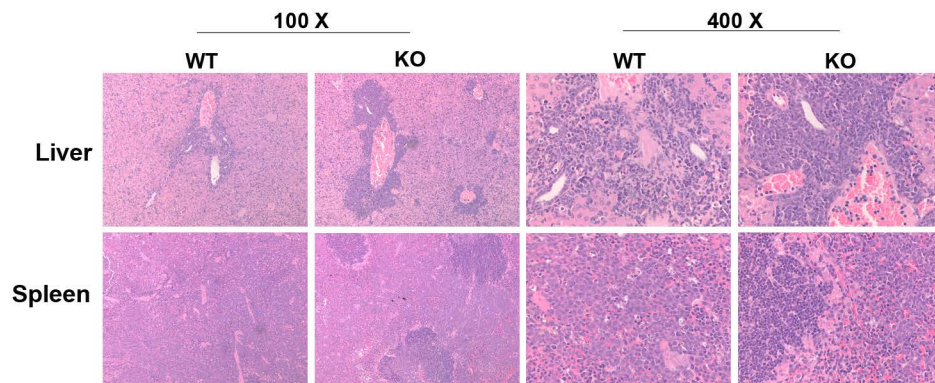

Supplement: MOESM2 [file 11057808]
